# Supplementary material for: Diabetic Retinopathy in Greece: Prevalence and Risk Factors Studied in the Medical Retina Clinic of a Greek Tertiary Hospital
Source: Research Square preprint supplement (doi:10.21203/rs.3.rs-458090/v1), 2021-05-05
Supplement: Supplementary file 1 [file 36507bb8b73d488c3dd0d492.xlsx]

## Sheet: Sheet1
Table 4 - N: 21	No DR	DR	p value	Binary Logistic Regression Analysis
			(Mann-Whitney U & χ2 test)
Males, n (%)	5 (45.5)	6 (54.5)	0.835	Confidence Interval (CI)	p value
Females, n (%)	5 (50)	5 (50)
Age, Mean (SD)	47.8 (22.1)	50.2 (12.2)	0.031	0.958-1.062	0.746
Duration of diabetes (years), Mean (SD)	19.7 (7.5)	27.8 (11.5)	0.369	0.986-1.217	0.09
HbA1c %, Mean (SD)	6.7 (0.6)	7.4 (1)	0.103	0.701-21.852	0.12
Hypertension, n (%)	4 (44.4)	5 (55.6)	0.801	0.084-4.822	0.661
Hypercholesterolemia, n (%)	3 (60)	2 (40)	0.525	0.328-69.184	0.253
Hypertriglyceridemia, n (%)	0	1 (100)	0.329	0	1
